# Supplementary material for: Assessing the Influence of Vegan, Vegetarian and Omnivore Oriented Westernized Dietary Styles on Human Gut Microbiota: A Cross Sectional Study
Source: PubMed Central journal article supplement (PMC5844980; doi:10.3389/fmicb.2018.00317), 2018-03-05

Supplementary Figure 1: Box plots of value of Body Fat Mass (BFM), Body Lean Mass (BLM), Body Mass Index (BMI) and Body Water Mass (BWM) of the participants by cohort (O=Omnivorous, V=Vegetarian, VG=Vegan)

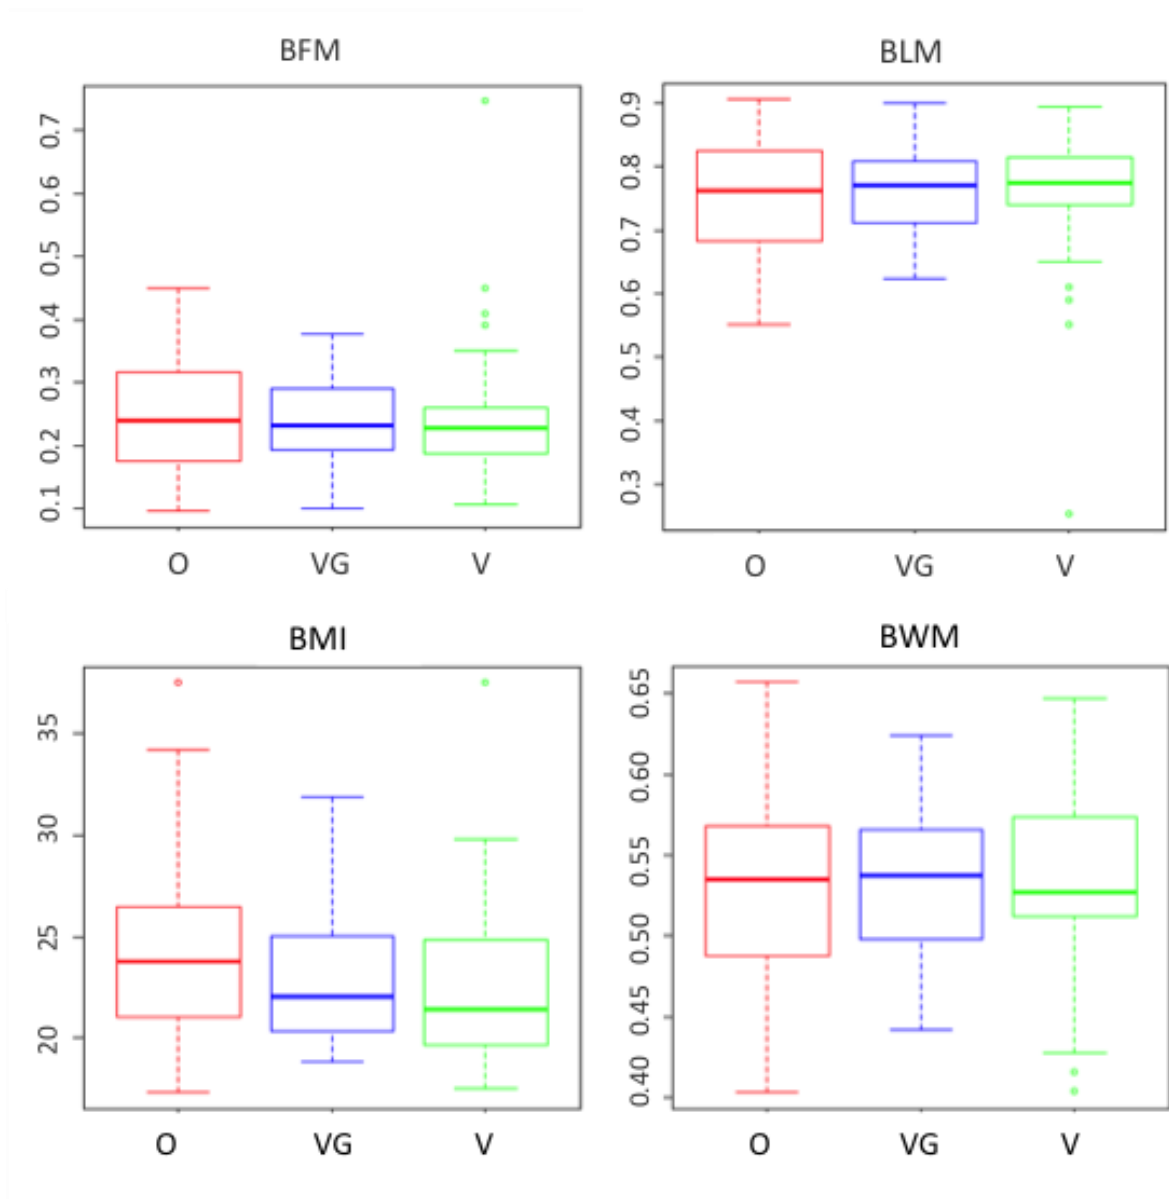

Supplement: Image_1.pdf [file Image_1.pdf]
