# Supplementary material for: Assessing the Influence of Vegan, Vegetarian and Omnivore Oriented Westernized Dietary Styles on Human Gut Microbiota: A Cross Sectional Study
Source: PubMed Central journal article supplement (PMC5844980; doi:10.3389/fmicb.2018.00317), 2018-03-05
Supplement: Image_2.pdf [file Image_2.pdf]

- 1 Supplementary Figure 2: Random Forest on Dietary data Feature Ranking according to the mean decrease
- 2 in accuracy

Variance importance on dietary information

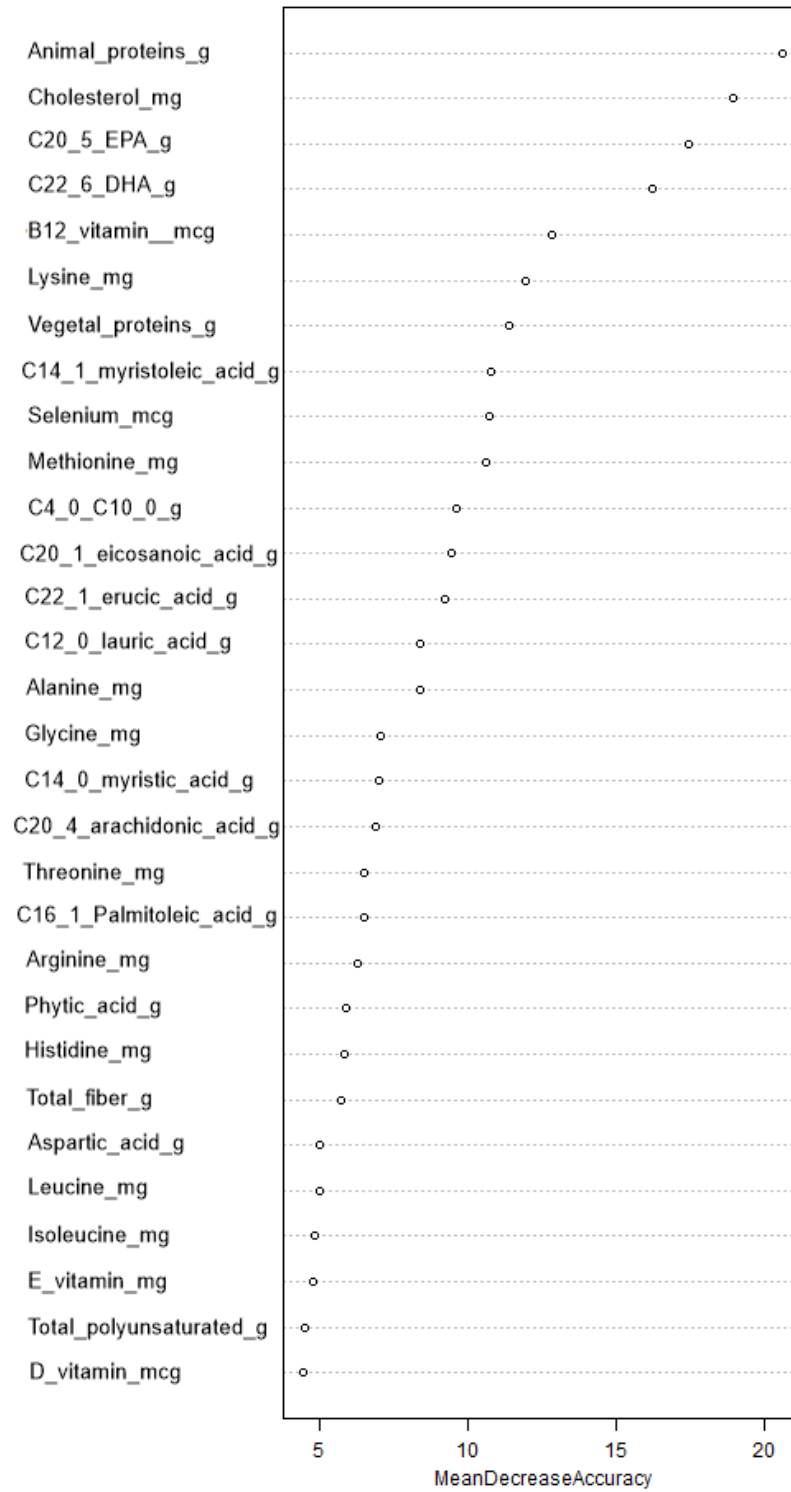

3

4
