# Supplementary material for: Assessing the Influence of Vegan, Vegetarian and Omnivore Oriented Westernized Dietary Styles on Human Gut Microbiota: A Cross Sectional Study
Source: PubMed Central journal article supplement (PMC5844980; doi:10.3389/fmicb.2018.00317), 2018-03-05

Supplementary Figure 3: Proportional abundance of the phyla found in each sample. X-axis represents the participants and the y-axis represents the proportion of counts assigned to each phylum.

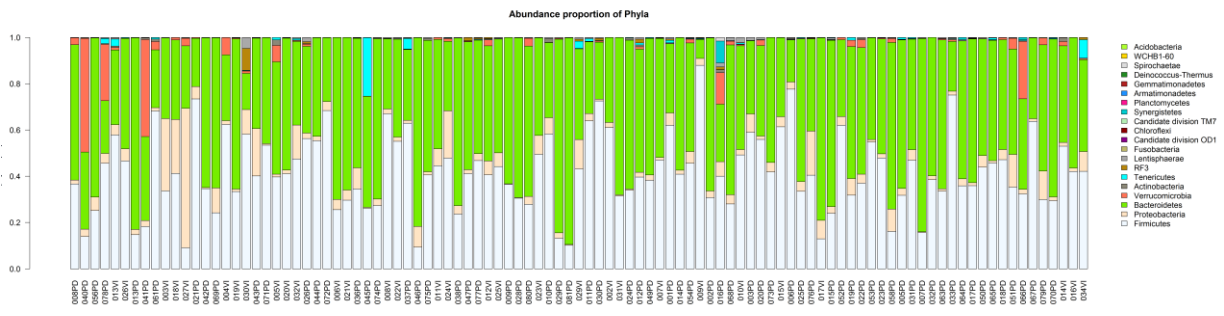

Supplement: Image_3.pdf [file Image_3.pdf]
