# Supplementary material for: Assessing the Influence of Vegan, Vegetarian and Omnivore Oriented Westernized Dietary Styles on Human Gut Microbiota: A Cross Sectional Study
Source: PubMed Central journal article supplement (PMC5844980; doi:10.3389/fmicb.2018.00317), 2018-03-05
Supplement: Image_4.pdf [file Image_4.pdf]

- 1 Supplementary Figure 4: Heatmap of Spearman's correlation of average percentage of kcals and genera
- 2 abundances

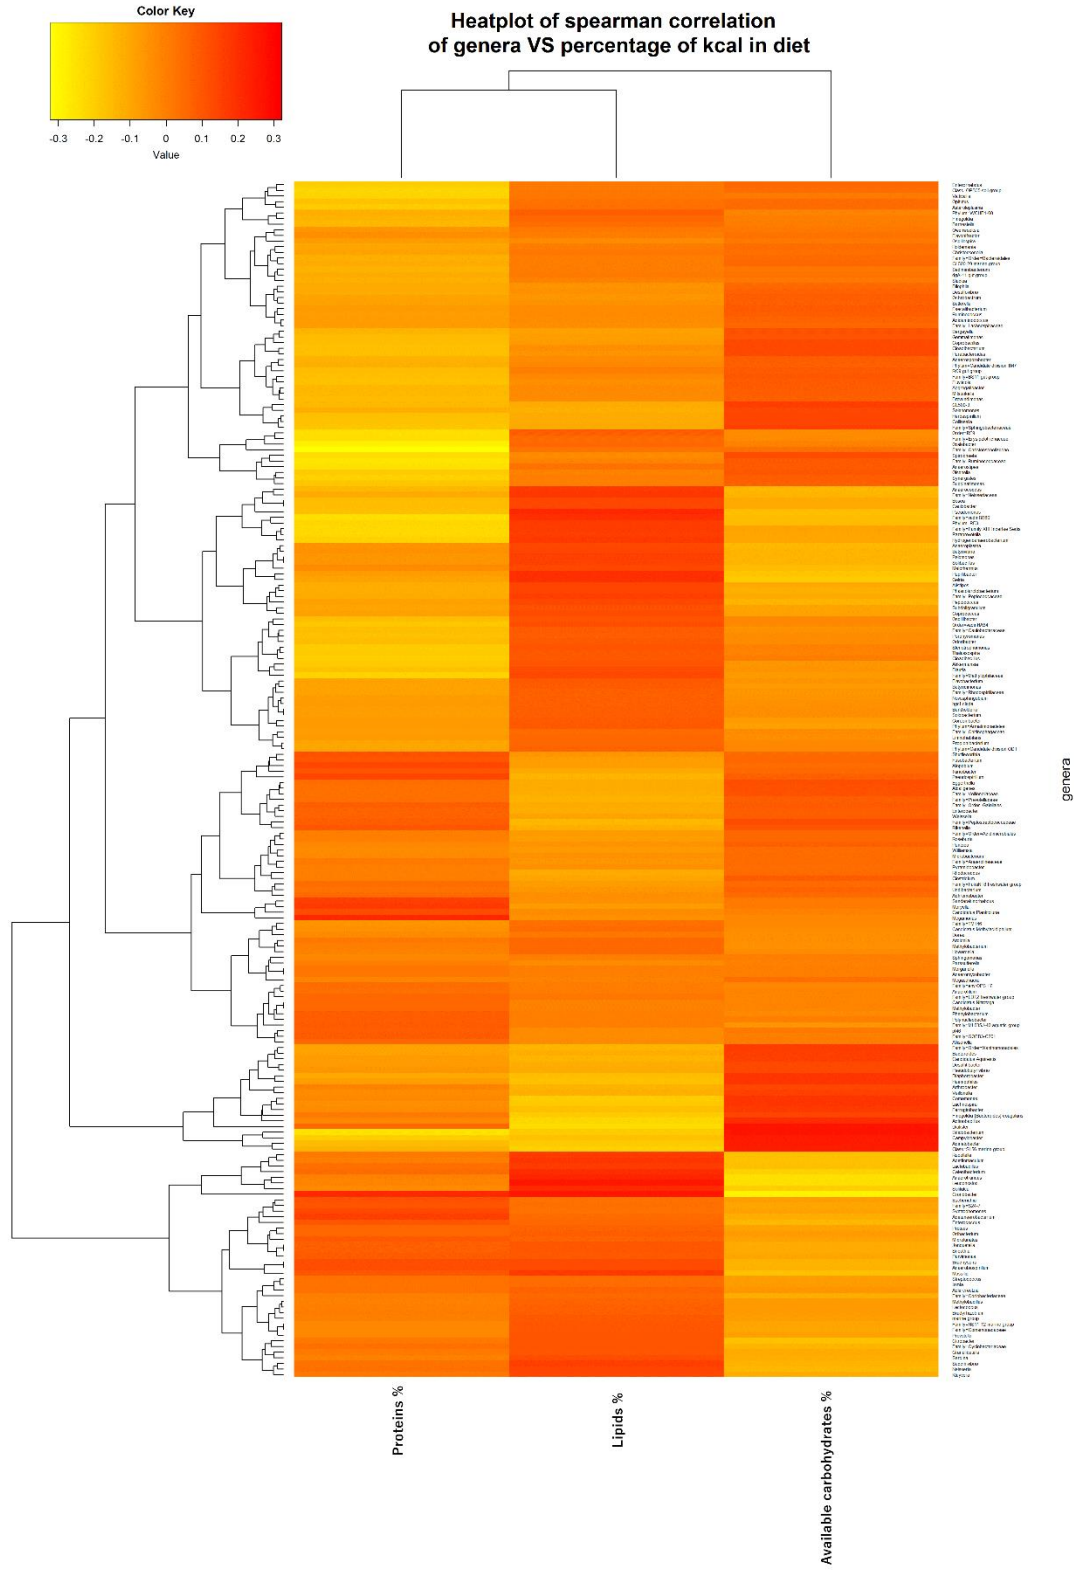

3

4

% kcal
